# Supplementary material for: 4D Printing of Electroactive Triple-Shape Composites
Source: Polymers (Basel). 2023 Feb 7;15(4):832. doi: 10.3390/polym15040832 (PMC9961650; doi:10.3390/polym15040832)
Supplement: Supplementary file 1 [file polymers-15-00832-s001.zip]

Archive with 4 entries (4 files):
- polymers-2197443-supplementary.pdf
- Video S1.mp4
- Video S2.mp4
- Video S3.mp4
